# Supplementary material for: Electronic health record analysis identifies kidney disease as the leading risk factor for hospitalization in confirmed COVID-19 patients
Source: PubMed Central journal article supplement (PMC7660530; doi:10.1371/journal.pone.0242182), 2020-11-12

**S1 Fig:** Study flow diagram.

SARS-CoV-2=severe acute respiratory syndrome coronavirus 2; COVID-19 severe acute respiratory syndrome coronavirus 2.

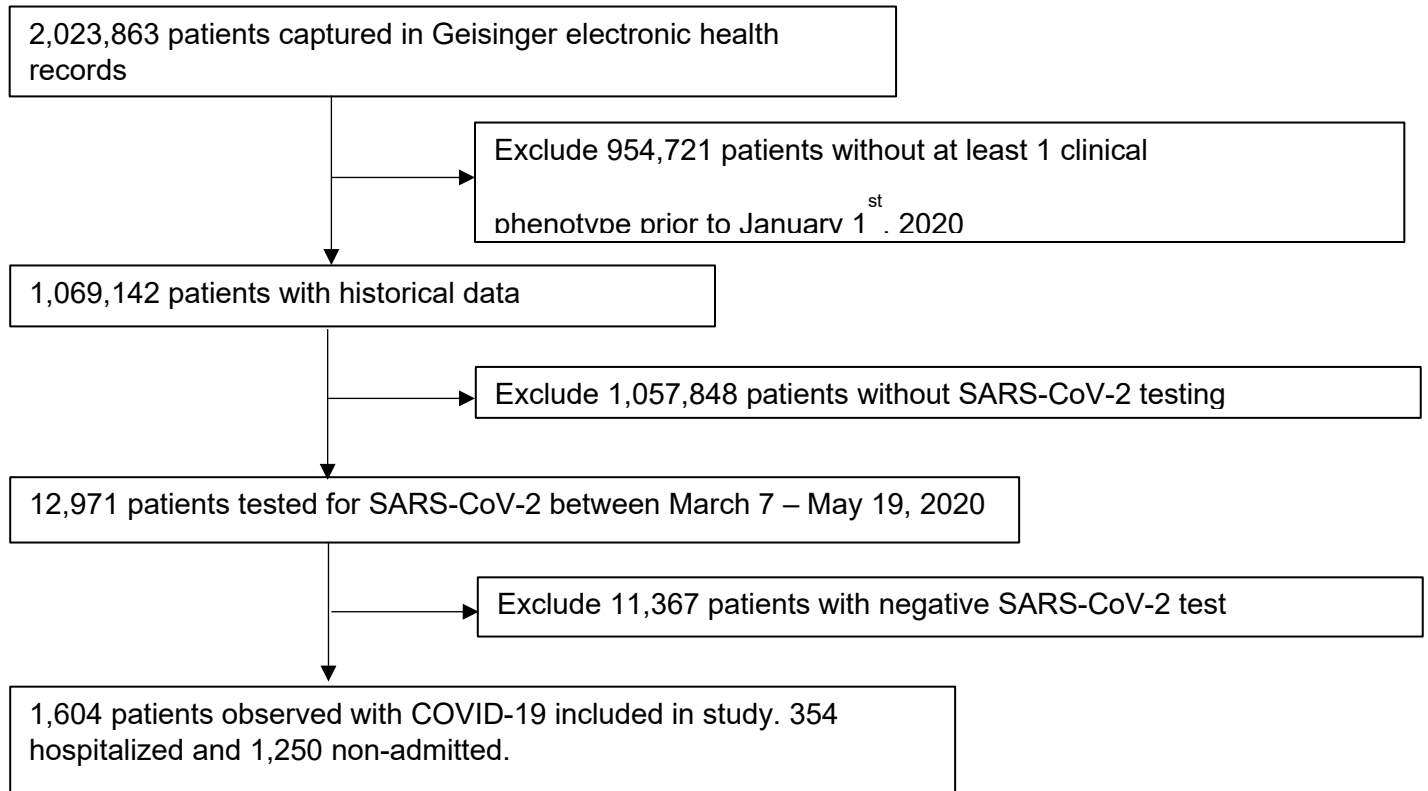

Supplement: pone.0242182.s003.pdf [file pone.0242182.s003.pdf]
